# Supplementary material
Source: PubMed Central journal article supplement (PMC5771532)
Supplement: Supp_Table1.pdf [file Supp_Table1.pdf]

## Supplementary Data

SUPPLEMENTARY TABLE S1. NUMBER AND PERCENTAGE  
OF WOMEN WITH TREATMENT-RELATED ADVERSE  
EVENTS WITH OSPEMIFENE 60 MG

| <i>Preferred term,<sup>a</sup> n (%)</i> | <i>Placebo<br/>(n=958)</i> | <i>Ospemifene<br/>60 mg (n=1242)</i> |
|------------------------------------------|----------------------------|--------------------------------------|
| Any treatment-related AE                 | 157 (16.4)                 | 378 (30.4)                           |
| Hot flush                                | 25 (2.6)                   | 93 (7.5)                             |
| Vaginal discharge                        | 3 (0.3)                    | 47 (3.8)                             |
| Muscle spasms                            | 9 (0.9)                    | 40 (3.2)                             |
| Headache                                 | 23 (2.4)                   | 30 (2.4)                             |
| Hyperhidrosis                            | 6 (0.6)                    | 20 (1.6)                             |
| Genital discharge                        | 1 (0.1)                    | 16 (1.3)                             |

<sup>a</sup>Subjects with >1 treatment-related AE that coded for the same preferred term were counted once for that preferred term.  
AE, adverse event.
