# Supplementary material
Source: PubMed Central journal article supplement (PMC5771532)
Supplement: Supp_Table2.pdf [file Supp_Table2.pdf]

SUPPLEMENTARY TABLE S2. NUMBER AND PERCENTAGE OF WOMEN WITH TREATMENT-EMERGENT ADVERSE EVENTS LEADING TO DISCONTINUATION

| <i>Preferred term,<sup>a</sup> n (%)</i> | <i>Placebo<br/>(n=958)</i> | <i>Ospemifene<br/>60 mg (n=1242)</i> |
|------------------------------------------|----------------------------|--------------------------------------|
| Any TEAE leading to discontinuation      | 36 (3.8)                   | 95 (7.6)                             |
| Hot flush                                | 3 (0.3)                    | 13 (1.0)                             |
| Muscle spasms                            | 1 (0.1)                    | 7 (0.6)                              |
| Headache                                 | 2 (0.2)                    | 6 (0.5)                              |
| Vaginal discharge                        | 0                          | 6 (0.5)                              |
| Diarrhea                                 | 3 (0.3)                    | 5 (0.4)                              |
| Nausea                                   | 1 (0.1)                    | 5 (0.4)                              |
| Uterine polyp                            | 1 (0.1)                    | 5 (0.4)                              |
| Insomnia                                 | 1 (0.1)                    | 4 (0.3)                              |
| Rash                                     | 1 (0.1)                    | 4 (0.3)                              |
| Abdominal pain, lower                    | 0                          | 3 (0.2)                              |
| Pain in extremity                        | 0                          | 3 (0.2)                              |
| Pruritus                                 | 0                          | 3 (0.2)                              |
| Restless leg syndrome                    | 0                          | 3 (0.2)                              |
| Weight increased                         | 0                          | 3 (0.2)                              |
| Arthralgia                               | 0                          | 2 (0.2)                              |
| Constipation                             | 1 (0.1)                    | 2 (0.2)                              |
| Deep vein thrombosis                     | 0                          | 2 (0.2)                              |
| Drug eruption                            | 0                          | 2 (0.2)                              |
| Drug hypersensitivity                    | 0                          | 2 (0.2)                              |
| Hyperhidrosis                            | 0                          | 2 (0.2)                              |
| Hyperlipidemia                           | 1 (0.1)                    | 2 (0.2)                              |
| Pruritus, generalized                    | 0                          | 2 (0.2)                              |
| Syncope                                  | 0                          | 2 (0.2)                              |
| Abdominal pain, upper                    | 1 (0.1)                    | 1 (0.1)                              |
| Anxiety                                  | 0                          | 1 (0.1)                              |
| Cerebrovascular accident                 | 0                          | 1 (0.1)                              |
| Dizziness                                | 1 (0.1)                    | 1 (0.1)                              |
| Dyspnea                                  | 1 (0.1)                    | 1 (0.1)                              |
| Palpitations                             | 0                          | 1 (0.1)                              |
| Dyspepsia                                | 1 (0.1)                    | 0                                    |

<sup>a</sup>Subjects with >1 TEAE that coded for the same preferred term were counted once for that preferred term.  
TEAE, treatment-emergent adverse event.
