# Supplementary material
Source: PubMed Central journal article supplement (PMC5771532)
Supplement: Supp_Table3.pdf [file Supp_Table3.pdf]

SUPPLEMENTARY TABLE S3. NUMBER AND PERCENTAGE OF WOMEN WITH SERIOUS TREATMENT-EMERGENT ADVERSE EVENTS WITH OSPEMIFENE 60 MG

| <i>Preferred term, n (%)</i>          | <i>Placebo (n=958)</i> | <i>Ospemifene 60 mg (n=1242)</i> |
|---------------------------------------|------------------------|----------------------------------|
| Any serious TEAE                      | 17 (1.8)               | 32 (2.6)                         |
| Appendicitis                          | 0                      | 2 (0.2)                          |
| Arthrodesis                           | 0                      | 1 (<0.1)                         |
| Autoimmune thyroiditis                | 0                      | 1 (<0.1)                         |
| Deep vein thrombosis                  | 0                      | 2 (0.2)                          |
| Diverticulitis                        | 1 (0.1)                | 2 (0.2)                          |
| Blepharoplasty                        | 0                      | 1 (<0.1)                         |
| Bone disorder                         | 0                      | 1 (<0.1)                         |
| Breast enlargement                    | 0                      | 1 (<0.1)                         |
| Breast prosthesis implantation        | 0                      | 1 (<0.1)                         |
| Burns third degree                    | 0                      | 1 (<0.1)                         |
| Cardiac ablation                      | 0                      | 1 (<0.1)                         |
| Carpal tunnel decompression           | 0                      | 1 (<0.1)                         |
| Cerebral hemorrhage                   | 0                      | 1 (<0.1)                         |
| Cerebrovascular accident              | 1 (0.1)                | 1 (<0.1)                         |
| Cholelithiasis                        | 0                      | 1 (<0.1)                         |
| Chronic obstructive pulmonary disease | 0                      | 1 (<0.1)                         |
| Dehydration                           | 0                      | 1 (<0.1)                         |
| Encephalitis herpes                   | 0                      | 1 (<0.1)                         |
| Endometrial hyperplasia               | 0                      | 1 (<0.1)                         |
| Gastritis                             | 1 (0.1)                | 1 (<0.1)                         |
| Gastrointestinal inflammation         | 0                      | 1 (<0.1)                         |
| Global amnesia                        | 0                      | 1 (<0.1)                         |
| Hiatus hernia                         | 0                      | 1 (<0.1)                         |
| Hypoparathyroidism                    | 0                      | 1 (<0.1)                         |
| Intracranial aneurysm                 | 1 (0.1)                | 1 (<0.1)                         |
| Lower limb fracture                   | 0                      | 1 (<0.1)                         |
| Mammoplasty                           | 0                      | 1 (<0.1)                         |
| Meningitis Candida                    | 0                      | 1 (<0.1)                         |
| Mesothelioma malignant                | 0                      | 1 (<0.1)                         |
| Migraine                              | 0                      | 1 (<0.1)                         |
| Nausea                                | 3 (0.3)                | 1 (<0.1)                         |
| Noncardiac chest pain                 | 1 (0.1)                | 1 (<0.1)                         |
| Osteoarthritis                        | 0                      | 1 (<0.1)                         |
| Ovarian cyst                          | 0                      | 1 (<0.1)                         |
| Road traffic accident                 | 0                      | 1 (<0.1)                         |
| Skin reaction                         | 0                      | 1 (<0.1)                         |
| Spinal column stenosis                | 0                      | 1 (<0.1)                         |
| Upper respiratory tract infection     | 0                      | 1 (<0.1)                         |
| Ankle fracture                        | 1                      | 0                                |
| Bipolar disorder                      | 1                      | 0                                |
| Bladder prolapse                      | 1                      | 0                                |
| Breast cancer                         | 1                      | 0                                |
| Breast cancer <i>in situ</i>          | 1                      | 0                                |
| Calculus urinary                      | 1                      | 0                                |
| Dizziness                             | 2                      | 0                                |
| Dyspnea                               | 1                      | 0                                |
| Lumbar spinal stenosis                | 1                      | 0                                |
| Lung adenocarcinoma                   | 1                      | 0                                |
| Mitral valve incompetence             | 1                      | 0                                |
| Palpitations                          | 1                      | 0                                |
| Patella fracture                      | 1                      | 0                                |
| Pericarditis                          | 1                      | 0                                |
| Peridiverticular abscess              | 1                      | 0                                |
| Pleural effusion                      | 1                      | 0                                |
| Psychotic disorder                    | 1                      | 0                                |
| Pulmonary hypertension                | 1                      | 0                                |
| RBC sedimentation rate increased      | 1                      | 0                                |
| Seronegative arthritis                | 1                      | 0                                |
| Suicide attempt                       | 1                      | 0                                |
| Tachycardia                           | 1                      | 0                                |
| Urinary tract infection               | 1                      | 0                                |

<sup>a</sup>TEAEs were those reported within 30 days of the last dose.  
RBC, red blood cells.
